# Supplementary material
Source: PubMed Central journal article supplement (PMC3674150)

## Supplemental Figure S1.

A

|           | Cellular proliferation |                                        |                            |                  |                                        |                            | GST-ABL kinase autophosphorylation |           |
|-----------|------------------------|----------------------------------------|----------------------------|------------------|----------------------------------------|----------------------------|------------------------------------|-----------|
|           | K562 cells             |                                        |                            | LAMA cells       |                                        |                            | IC <sub>50</sub>                   | Reference |
|           | IC <sub>50</sub>       | Concentrations used in washout studies | Fold over IC <sub>50</sub> | IC <sub>50</sub> | Concentrations used in washout studies | Fold over IC <sub>50</sub> |                                    |           |
| dasatinib | 0.67 nM                | 10 nM<br>100 nM                        | 14.9<br>149                | 0.14 nM          | 10 nM<br>100 nM                        | 71.4<br>714                | 3.7 nM                             | (1)       |
| ponatinib | 1.7 nM                 | 10 nM<br>100 nM                        | 6.0<br>60.3                | 0.32 nM          | 10 nM<br>100 nM                        | 31.3<br>313                | 8.9 nM                             | (1)       |
| nilotinib | 18.8 nM                | 500 nM<br>5000 nM                      | 26.6<br>266                | 8.3 nM           | 500 nM<br>5000 nM                      | 60.2<br>602                | 21.3 nM                            | (1)       |
| imatinib  | 319 nM                 | 500 nM<br>5000 nM                      | 1.6<br>15.7                | 103 nM           | 500 nM<br>5000 nM                      | 4.9<br>48.5                | 430 nM                             | (1)       |
| DCC-2036  | 27.1 nM                | 500 nM<br>5000 nM                      | 18.5<br>185                | 12.3 nM          | 500 nM<br>5000 nM                      | 40.7<br>407                | 29.0 nM                            | (2)       |

## REFERENCES:

(1) O'Hare et al., *Cancer Cell* 2009; 16 (5):401-412.(2) Eide et al., *Cancer Research* 2011; 71 (9):3189-3195.

B

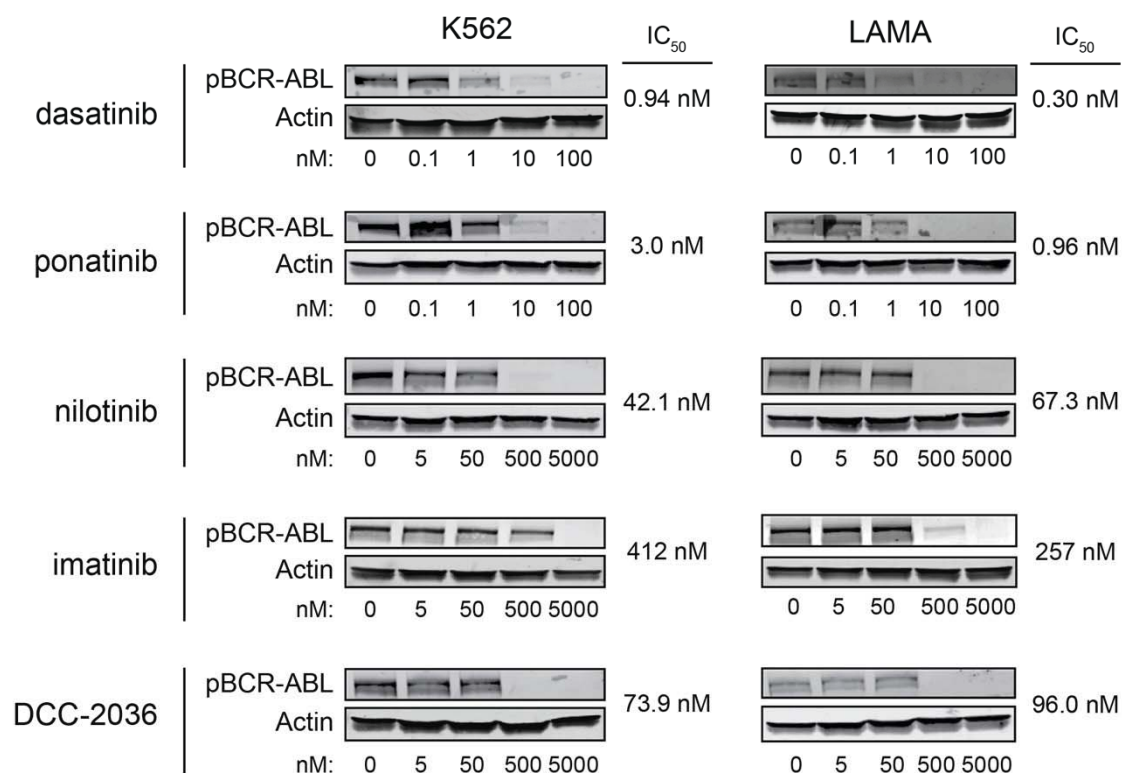



Supplemental Figure S3.

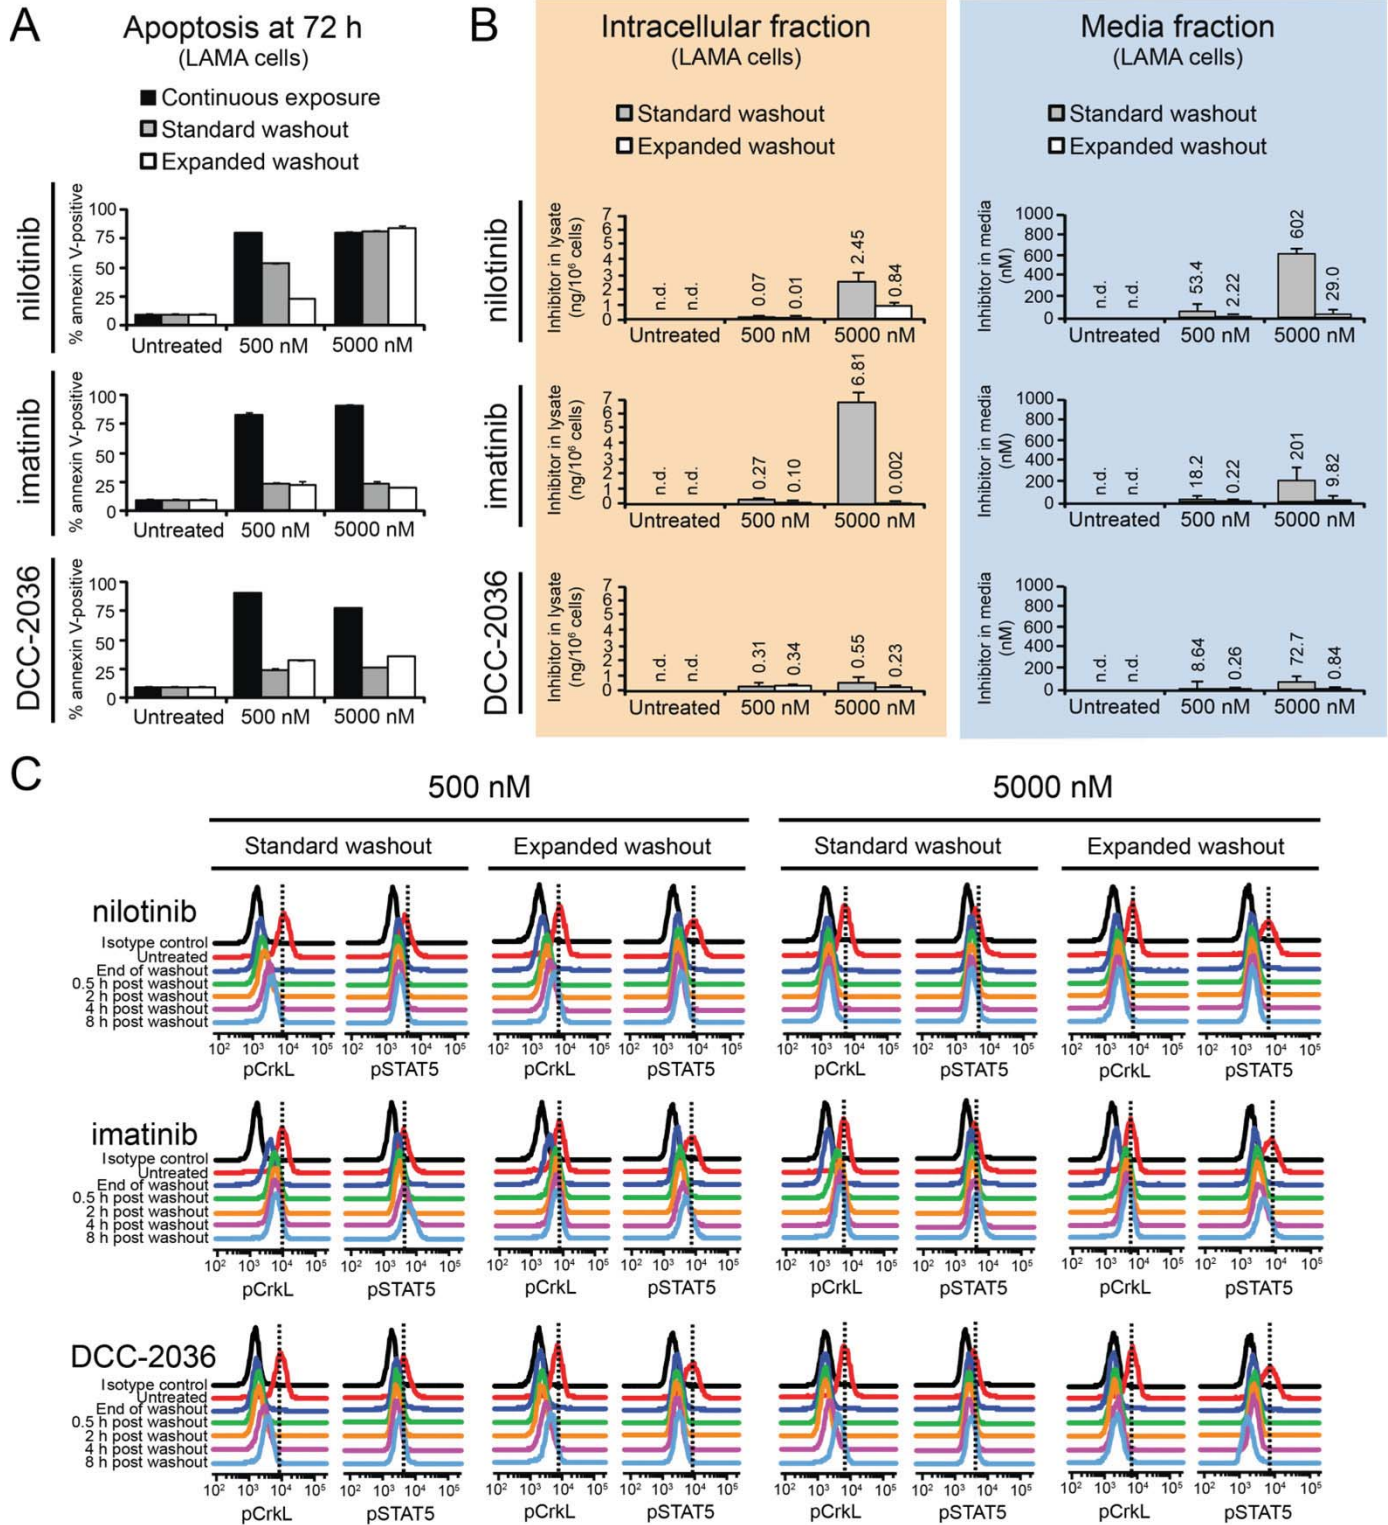

## Supplemental Figure S4.

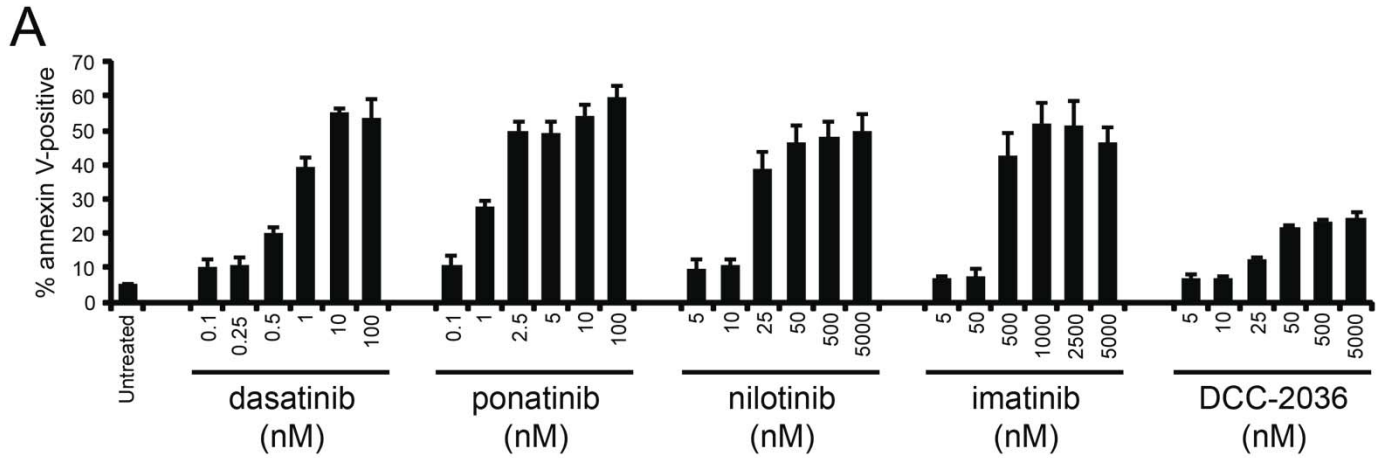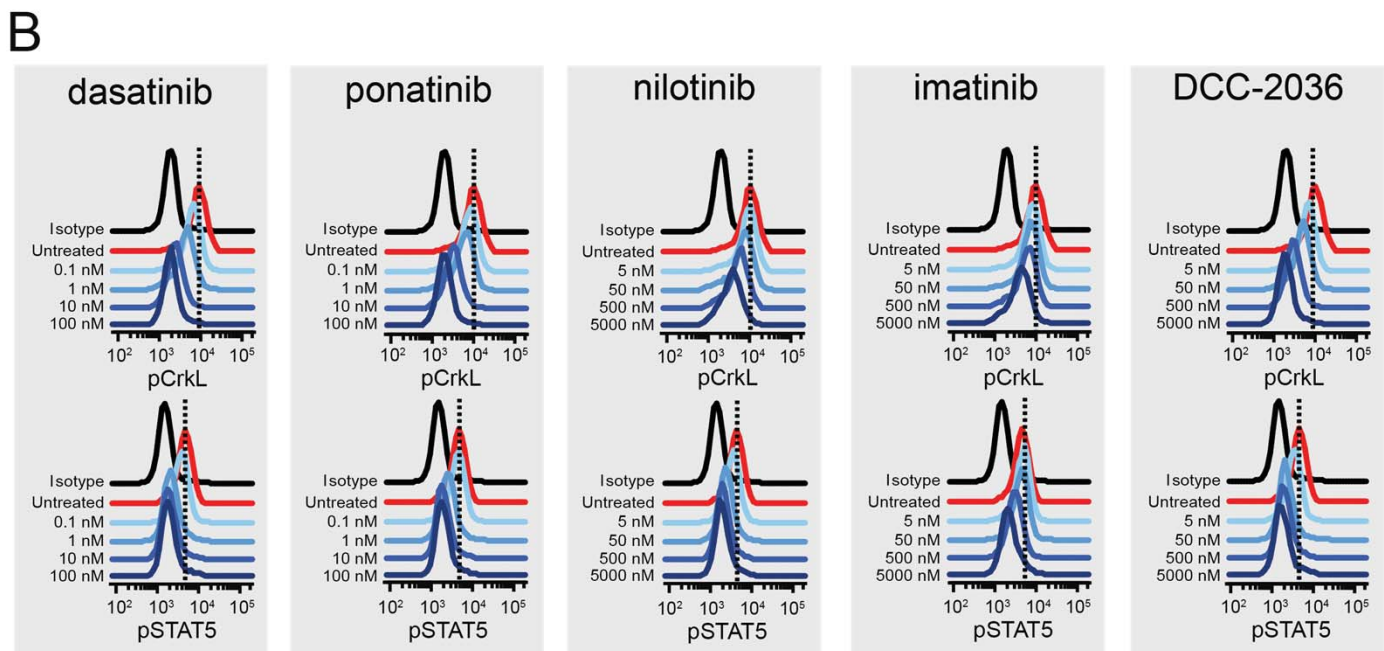

# Supplemental Figure S5.

Newly diagnosed CML (12/061)

Newly diagnosed CML (11/442)

**A**

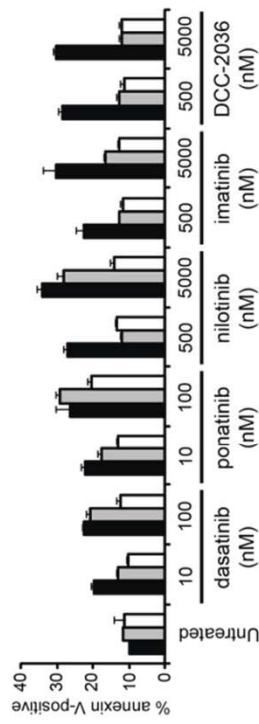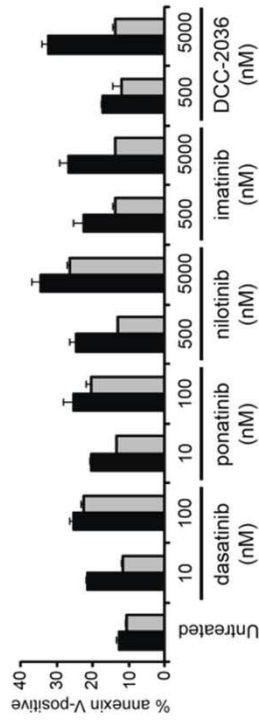

**B**

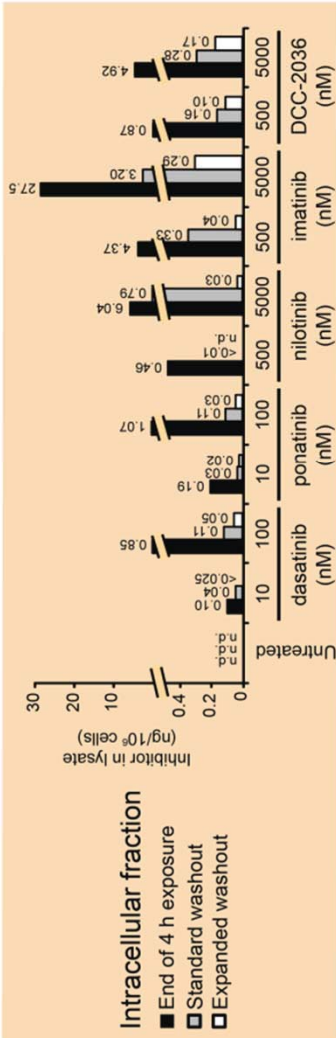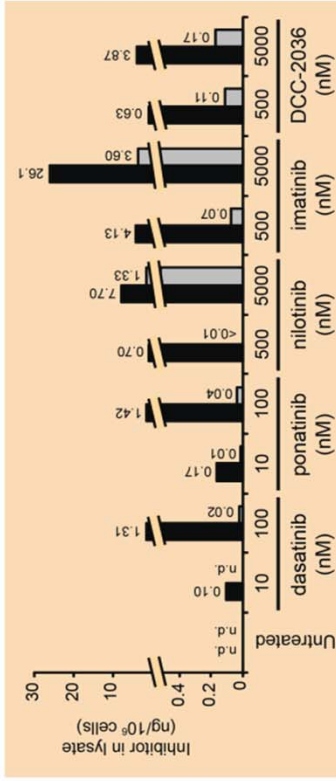

**C**

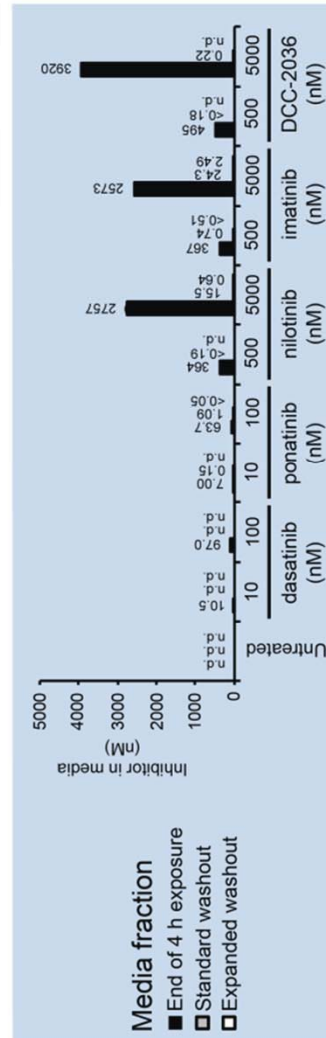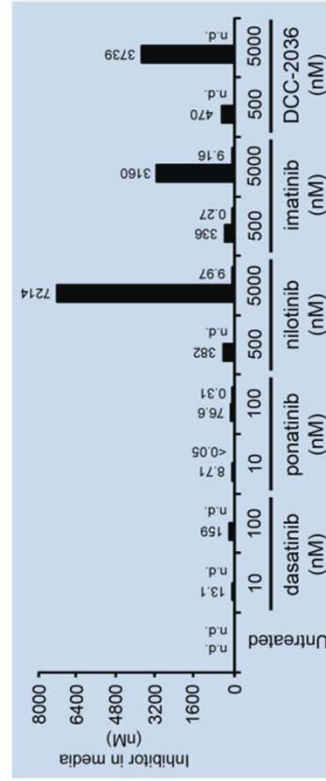

## Supplemental Figure S6.

CML M-BC harboring BCR-ABL<sup>T315I</sup> (07/103)

A

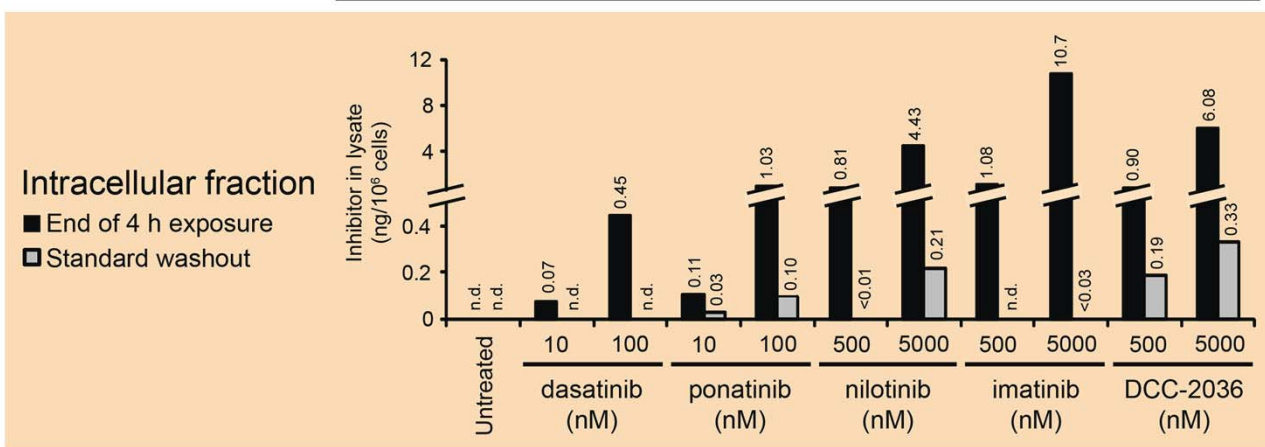

B

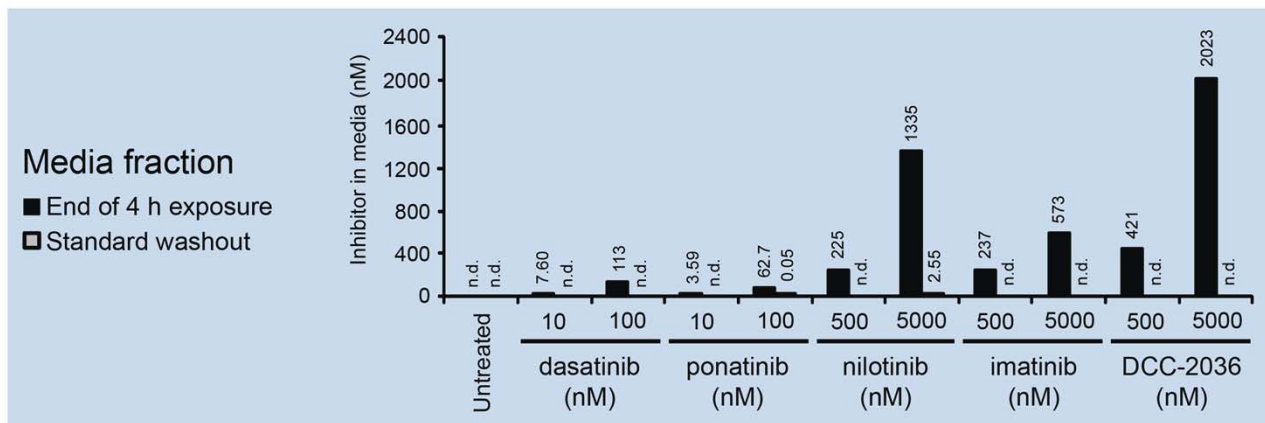

Supplement: NIHMS465156-supplement-2.pdf [file NIHMS465156-supplement-2.pdf]
