# Supplementary material
Source: PubMed Central journal article supplement (PMC3674150)
Supplement: NIHMS465156-supplement-1.pdf [file NIHMS465156-supplement-1.pdf]

## Supplemental Table S1.

|           |           | Standard washout     |                      | Expanded washout     |                      |        |
|-----------|-----------|----------------------|----------------------|----------------------|----------------------|--------|
|           |           | pCrkL                | pSTAT5               | pCrkL                | pSTAT5               |        |
|           |           | (% of untreated MFI) |        |
|           | Timepoint |                      |                      |                      |                      |        |
| dasatinib | 10 nM     | Untreated            | 100.0%               | 100.0%               | 100.0%               | 100.0% |
|           |           | End of washout       | 12.6%                | 14.8%                | 12.2%                | 22.0%  |
|           |           | 8 h post washout     | 93.0%                | 71.4%                | 131.4%               | 104.4% |
|           |           | 24 h post washout    | 77.9%                | 74.9%                | 130.3%               | 112.4% |
|           | 100 nM    | Untreated            | 100.0%               | 100.0%               | 100.0%               | 100.0% |
|           |           | End of washout       | 1.9%                 | 7.7%                 | 2.8%                 | 16.2%  |
|           |           | 8 h post washout     | 78.5%                | 17.5%                | 87.6%                | 41.2%  |
|           |           | 24 h post washout    | 58.0%                | 7.1%                 | 68.3%                | 35.4%  |
| ponatinib | 10 nM     | Untreated            | 100.0%               | 100.0%               | 100.0%               | 100.0% |
|           |           | End of washout       | 15.2%                | 14.7%                | 31.2%                | 25.2%  |
|           |           | 8 h post washout     | 74.9%                | 23.6%                | 83.8%                | 38.2%  |
|           |           | 24 h post washout    | 34.3%                | 8.7%                 | 76.0%                | 24.6%  |
|           | 100 nM    | Untreated            | 100.0%               | 100.0%               | 100.0%               | 100.0% |
|           |           | End of washout       | 1.9%                 | 6.5%                 | 3.2%                 | 15.9%  |
|           |           | 8 h post washout     | 9.4%                 | 9.1%                 | 26.4%                | 21.9%  |
|           |           | 24 h post washout    | 0.4%                 | 1.7%                 | 6.0%                 | 6.0%   |
| nilotinib | 500 nM    | Untreated            | 100.0%               | 100.0%               | 100.0%               | 100.0% |
|           |           | End of washout       | 5.8%                 | 7.2%                 | 7.5%                 | 12.6%  |
|           |           | 8 h post washout     | 80.9%                | 33.0%                | 100.4%               | 111.8% |
|           |           | 24 h post washout    | 78.2%                | 33.5%                | 105.6%               | 101.4% |
|           | 5000 nM   | Untreated            | 100.0%               | 100.0%               | 100.0%               | 100.0% |
|           |           | End of washout       | 3.4%                 | 1.7%                 | 3.9%                 | 7.6%   |
|           |           | 8 h post washout     | 14.0%                | 5.7%                 | 80.6%                | 20.1%  |
|           |           | 24 h post washout    | 10.3%                | 1.5%                 | 68.6%                | 16.7%  |
| imatinib  | 500 nM    | Untreated            | 100.0%               | 100.0%               | 100.0%               | 100.0% |
|           |           | End of washout       | 61.8%                | 19.6%                | 63.8%                | 25.8%  |
|           |           | 8 h post washout     | 115.4%               | 138.1%               | 113.7%               | 213.3% |
|           |           | 24 h post washout    | 118.4%               | 97.8%                | 108.2%               | 97.1%  |
|           | 5000 nM   | Untreated            | 100.0%               | 100.0%               | 100.0%               | 100.0% |
|           |           | End of washout       | 6.8%                 | 3.6%                 | 9.4%                 | 9.1%   |
|           |           | 8 h post washout     | 77.9%                | 115.9%               | 123.6%               | 175.4% |
|           |           | 24 h post washout    | 76.2%                | 74.1%                | 136.8%               | 91.8%  |
| DCC-2036  | 500 nM    | Untreated            | 100.0%               | 100.0%               | 100.0%               | 100.0% |
|           |           | End of washout       | 5.1%                 | 6.7%                 | 6.2%                 | 12.5%  |
|           |           | 8 h post washout     | 91.6%                | 61.5%                | 92.2%                | 102.5% |
|           |           | 24 h post washout    | 90.3%                | 73.9%                | 98.6%                | 95.7%  |
|           | 5000 nM   | Untreated            | 100.0%               | 100.0%               | 100.0%               | 100.0% |
|           |           | End of washout       | 0.9%                 | 2.0%                 | 1.2%                 | 6.5%   |
|           |           | 8 h post washout     | 62.6%                | 32.5%                | 114.8%               | 71.8%  |
|           |           | 24 h post washout    | 65.9%                | 46.6%                | 132.8%               | 90.9%  |

NOTE: Percent of untreated mean fluorescence intensity (MFI) values were calculated as follows:  $([\text{stained MFI}] - [\text{isotype MFI}] / ([\text{stained MFI}] \text{ for untreated cells}] - [\text{isotype MFI} \text{ for untreated cells}]) \times 100$ . Graphical representation of each value is shown immediately to the the right, with red dashed lines provided as a reference to the level of untreated controls.

## Supplemental Table S2.

## ABL kinase:inhibitor dissociation

| Inhibitor     | Active<br>$t_{1/2}$ (h) | Inactive<br>$t_{1/2}$ (h) |
|---------------|-------------------------|---------------------------|
| dasatinib     | 30                      | 6.8                       |
| ponatinib     | >48                     | >48                       |
| nilotinib     | 10                      | >48                       |
| imatinib      | 0.029                   | 0.76                      |
| DCC-2036      | 26                      | >48                       |
| staurosporine | <0.017                  | <0.017                    |
